# Supplementary material for: Dominant Role of Nucleotide Substitution in the Diversification of Serotype 3 Pneumococci over Decades and during a Single Infection
Source: PubMed Central journal article supplement (PMC3794909; doi:10.1371/journal.pgen.1003868), 2013-10-10

Figure S8

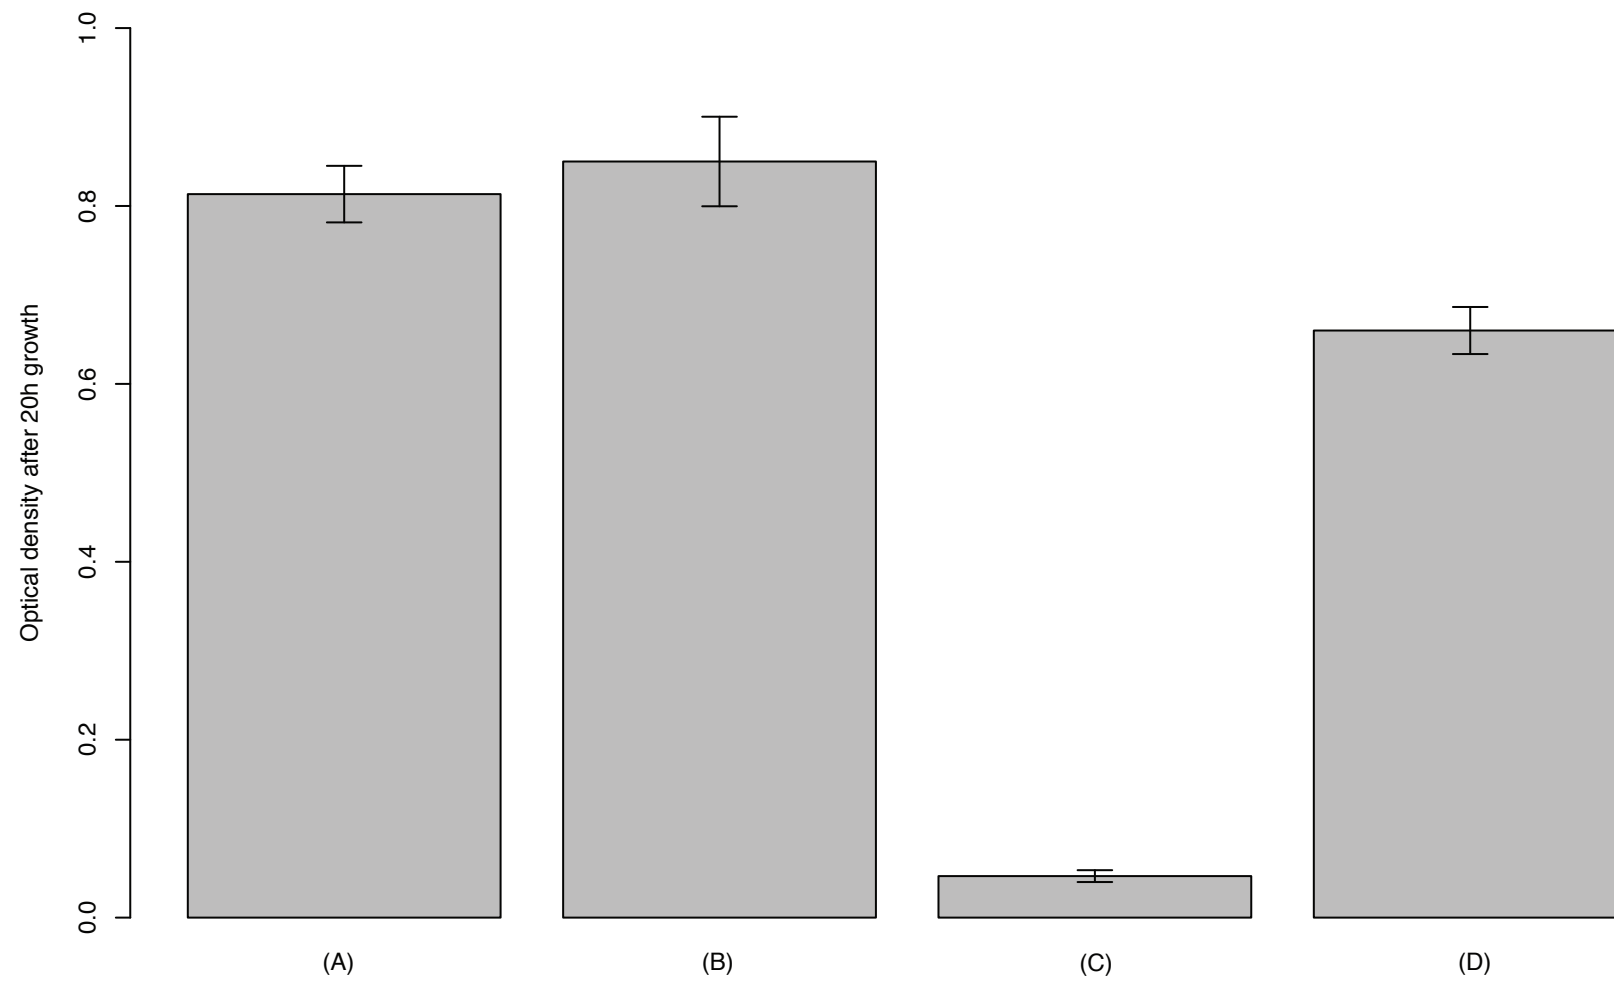

Supplement: pgen.1003868.s008.pdf [file pgen.1003868.s008.pdf]
