# Supplementary material for: Dominant Role of Nucleotide Substitution in the Diversification of Serotype 3 Pneumococci over Decades and during a Single Infection
Source: PLoS Genet. 2013 Oct 10;9(10):e1003868. doi: 10.1371/journal.pgen.1003868 (PMC3794909; doi:10.1371/journal.pgen.1003868)
Supplement: Table S1 — Epidemiological data and ENA accession codes for all sequences used in the phylogenomic analysis. (XLSX) [file pgen.1003868.s011.xlsx]

## Sheet: Sheet1
Strain	Date of Isolation	Country of Isolation	Sequence Type	Source	Sequencing Technology	Accession Code
BHN642	1998	Sweden	180	Invasive	Illumina	ERR025318
BHN643	1998	Sweden	180	Invasive	Illumina	ERR025321
BHN628	2000	Sweden	180	Invasive	Illumina	ERR025309
BHN369	2000	Sweden	180	Invasive	Illumina	ERR025301
BHN383	2001	Sweden	180	Invasive	Illumina	ERR025302
BHN640	1998	Sweden	180	Invasive	Illumina	ERR025308
BHN647	2007	Sweden	180	Meningitis	Illumina	ERR025325
BHN630	2000	Sweden	180	Invasive	Illumina	ERR025311
BHN632	1998	Sweden	180	Invasive	Illumina	ERR025313
BHN622	1999	Sweden	180	Invasive	Illumina	ERR025304
BHN638	1998	Sweden	180	Invasive	Illumina	ERR025307
BHN626	1999	Sweden	180	Invasive	Illumina	ERR025306
BHN650	1997	Sweden	180	Meningitis	Illumina	ERR025326
BHN651	1997	Sweden	180	Meningitis	Illumina	ERR025327
BHN579	1993-1995	Sweden	180	Invasive	Illumina	ERR026224
BHN625	1999	Sweden	180	Invasive	Illumina	ERR025296
BHN578	1993-1995	Sweden	180	Invasive	Illumina	ERR026214
BHN589	1996	Czech_Rep	180	Meningitis	Illumina	ERR026227
BHN580	1993-1995	Sweden	180	Invasive	Illumina	ERR026228
BHN621	1998	Sweden	180	Invasive	Illumina	ERR025303
BHN583	1995	Sweden	180	Invasive	Illumina	ERR026231
BHN624	1999	Sweden	180	Invasive	Illumina	ERR025295
BHN646	2001	Sweden	180	Invasive	Illumina	ERR025324
BHN654	2003	Sweden	180	Meningitis	Illumina	ERR025319
BHN633	2000	Sweden	SLV180	Invasive	Illumina	ERR025314
BHN657	2006	Sweden	180	Meningitis	Illumina	ERR025320
BHN645	2001	Sweden	180	Invasive	Illumina	ERR025323
BHN575	1994	Sweden	180	Invasive	Illumina	ERR026222
BHN593	2001	Czech_Rep	180	Meningitis	Illumina	ERR026243
BHN608	2003	Czech_Rep	180	Meningitis	Illumina	ERR025289
BHN604	2003	Czech_Rep	180	Meningitis	Illumina	ERR025285
BHN599	2001	Czech_Rep	180	Meningitis	Illumina	ERR026238
BHN597	2000	Czech_Rep	180	Meningitis	Illumina	ERR026247
BHN637	2001	Sweden	180	Invasive	Illumina	ERR025316
BHN605	2000	Czech_Rep	180	Meningitis	Illumina	ERR025286
BHN602	2003	Czech_Rep	180	Meningitis	Illumina	ERR025280
BHN035	1993-1995	Spain	180	Invasive	Illumina	ERR026232
BHN584	1993-1995	Spain	180	Invasive	Illumina	ERR026233
BHN600	2003	Czech_Rep	180	Meningitis	Illumina	ERR026239
BHN591	2003	Czech_Rep	180	Meningitis	Illumina	ERR026241
BHN592	2000	Czech_Rep	180	Meningitis	Illumina	ERR026242
BHN595	2001	Czech_Rep	180	Meningitis	Illumina	ERR026245
BHN585	1997	Czech_Rep	180	Meningitis	Illumina	ERR026234
BHN631	2000	Sweden	180	Invasive	Illumina	ERR025312
BHN577	1995	Sweden	180	Invasive	Illumina	ERR026213
BHN610	2000	Czech_Rep	SLV180	Meningitis	Illumina	ERR025291
BHN616	1998-2001	Sweden	180	Invasive	Illumina	ERR025293
BHN167	1998-2001	Sweden	180	Invasive	Illumina	ERR025298
BHN612	1999	Czech_Rep	180	Meningitis	Illumina	ERR025282
99-4038	1999	Scotland	180	Meningitis (blood)	454, capillary and Illumina	FQ312041
99-4039	1999	Scotland	180	Meningitis (CSF)	454, capillary and Illumina	FQ312044
02-1198	2002	Scotland	180	Neonatal sepsis	454 and capillary	CACH1000000
BHN572	1994	USA	180	Invasive	Illumina	ERR026218
BHN573	1994	USA	180	Invasive	Illumina	ERR026219
BHN413	1993	USA	180	Invasive	Illumina	ERR026215
BHN644	2000	Sweden	180	Invasive	Illumina	ERR025322
03-4183	2003	Netherlands	180	Carriage	454 and capillary	FQ312043
BHN594	2003	Czech_Rep	180	Meningitis	Illumina	ERR026244
BHN598	2000	Czech_Rep	180	Meningitis	Illumina	ERR026248
BHN623	1999	Sweden	180	Invasive	Illumina	ERR025294
BHN037	1998-2001	Sweden	1826	Invasive	Illumina	ERR025297
BHN570	1994	USA	180	Invasive	Illumina	ERR026216
BHN574	1995	USA	180	Invasive	Illumina	ERR026220
BHN587	2001	Czech_Rep	180	Meningitis	Illumina	ERR026225
BHN571	1995	USA	180	Invasive	Illumina	ERR026217
BHN629	2000	Sweden	180	Invasive	Illumina	ERR025310
BHN341	2001	Sweden	180	Invasive	Illumina	ERR025283
BHN636	2001	Sweden	180	Invasive	Illumina	ERR025315
BHN590	2002	Czech_Rep	180	Meningitis	Illumina	ERR026237
BHN588	1998	Czech_Rep	180	Meningitis	Illumina	ERR026226
BHN596	2003	Czech_Rep	180	Meningitis	Illumina	ERR026246
BHN601	1995	Czech_Rep	180	Meningitis	Illumina	ERR026240
BHN603	2002	Czech_Rep	SLV180	Meningitis	Illumina	ERR025284
OXC141	-	England	180	Carriage	Capillary	FQ312027
BHN606	2001	Czech_Rep	180	Meningitis	Illumina	ERR025287
BHN582	1993-1995	England	180	Invasive	Illumina	ERR026230
BHN609	2004	Czech_Rep	180	Meningitis	Illumina	ERR025290
BHN611	2002	Czech_Rep	505	Meningitis	Illumina	ERR025281
BHN586	1995	Czech_Rep	505	Meningitis	Illumina	ERR026235
BHN607	1999	Czech_Rep	180	Meningitis	Illumina	ERR025288
03-4156	2003	Netherlands	180	Carriage	454 and capillary	FQ312045
07-2838	2007	Bolivia	180	Carriage	454 and capillary	CACI1000000
